# Supplementary material for: Synthesis, Experimental and Theoretical Study of Azidochromones
Source: MDPI journal article supplement (doi:10.3390/molecules27092636), 2022-04-20
Supplement: s1 [file s1]

# Synthesis, Experimental and Theoretical Study of Azidochromones

Ena G. Narváez-Ordoñez <sup>1</sup>, Kevin A. Pabón-Carcelén <sup>1</sup>, Daniel A. Zurita-Saltos <sup>1</sup>, Pablo M. Bonilla-Valladares <sup>1</sup>, Trosky G. Yáñez-Darquea <sup>1</sup>, Luis A. Ramos-Guerrero <sup>2</sup>, Sonia E. Ulic <sup>3,4</sup>, Jorge L. Jios <sup>5</sup>, Gustavo A. Echeverría <sup>6</sup>, Oscar E. Piro <sup>6</sup>, Peter Langer <sup>7,8</sup>, Christian D. Alcívar-León <sup>1,\*</sup>, and Jorge Heredia-Moya <sup>9,\*</sup>

<sup>1</sup> Facultad de Ciencias Químicas, Universidad Central del Ecuador, Francisco Viteri s/n y Gilberto Gato Sobral, Quito 170521, Ecuador; egnavaezo@uce.edu.ec (E.G.N.-O.); kevincarcelen@outlook.com (K.A.P.-C.); dazuritas@uce.edu.ec (D.A.Z.-S.); pmbonilla@uce.edu.ec (P.M.B.-V.); tgyanez@uce.edu.ec (T.G.Y.-D.).

<sup>2</sup> Centro de Investigación de Alimentos CIAL, Universidad UTE, Quito 170527, Ecuador; luis.ramos@ute.edu.ec.

<sup>3</sup> CEQUINOR (CONICET-UNLP), Facultad de Ciencias Exactas, Universidad Nacional de La Plata, Bv. 120 N° 1465 (1900) La Plata, Argentina; sonia@quimica.unlp.edu.ar.

<sup>4</sup> Departamento de Ciencias Básicas, Universidad Nacional de Luján, Facultad de Ciencias Exactas, Rutas 5 y 7, Luján 6700, Buenos Aires, Argentina.

<sup>5</sup> Laboratorio UPL (UNLP-CIC), Camino Centenario e/505 y 508 (1897) M.B. Gonnet and Departamento de Química, Facultad de Ciencias Exactas, Universidad Nacional de La Plata, República Argentina. 47 esq. 115, La Plata 1900, Argentina; jljos@quimica.unlp.edu.ar.

<sup>6</sup> Departamento de Física, Facultad de Ciencias Exactas, Universidad Nacional de La Plata e IFLP (CONICET, CCT-La Plata), C.C. 67, 1900, La Plata 1900, Argentina; geche@fisica.unlp.edu.ar (G.A.E.); piro@fisica.unlp.edu.ar (O.E.P.).

<sup>7</sup> Institut für Chemie, Universität Rostock, Albert-Einstein-Str. 3a, 18059, Rostock 18059, Germany; peter.langer@uni-rostock.de.

<sup>8</sup> Leibniz Institut für Katalyse, Universität Rostock e. V. (LIKAT), Albert-Einstein-Str. 29a, 18059, Rostock 18059, Germany.

<sup>9</sup> Centro de Investigación Biomédica (CENBIO), Facultad de Ciencias de la Salud Eugenio Espejo, Universidad UTE, Quito 170527, Ecuador.

\* Correspondence: cdalcivar@uce.edu.ec (C.D.A.-L.); jorgeh.heredia@ute.edu.ec (J.H.-M.).

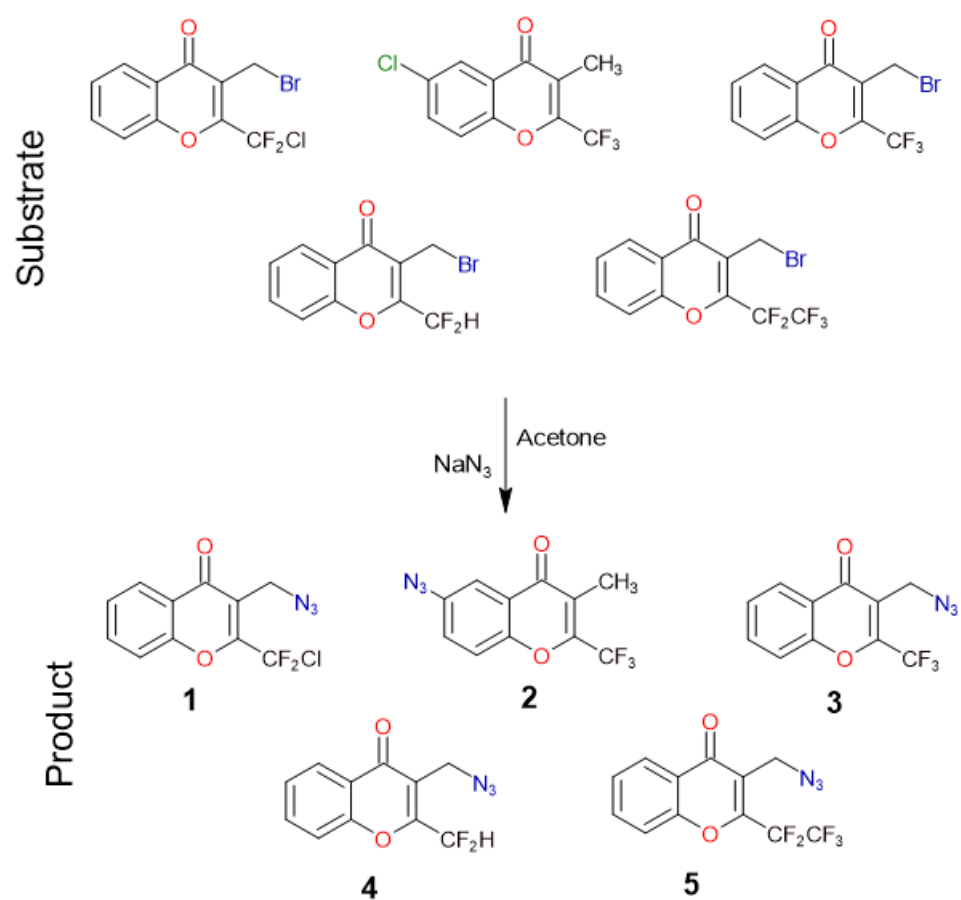

**Scheme S1.** General procedure of the synthesis of novel azidochromones.

**Table S1.** Reaction conditions for 1–5 compounds.

| Title | Brominated substrate (mmol) | NaN <sub>3</sub> (mmol) | Acetone (mL) | Temperature (°C) | Time (h) | Yield (%) | Melting point (°C) |
|-------|-----------------------------|-------------------------|--------------|------------------|----------|-----------|--------------------|
| 1     | 2.20                        | 7.7                     | 10           | r.t              | 24       | 97        | 70.5–73.6          |
| 2     | 0.28                        | 0.9                     | 10           | r.t              | 120      | 89        | 72–75.5            |
| 3     | 0.33                        | 1.26                    | 10           | r.t              | 12       | 56        | 80–81              |
| 4     | 0.27                        | 0.81                    | 10           | r.t              | 15       | 70        | 97.5–99.4          |
| 5     | 0.23                        | 0.76                    | 10           | r.t              | 15       | 28        | *                  |

\* : yellow oil

### Conformational Study

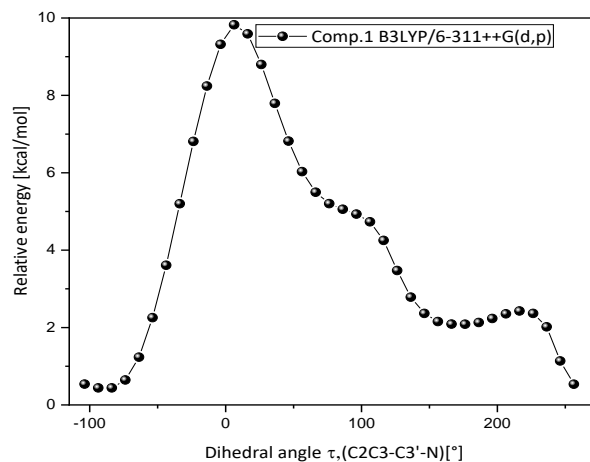

Figure S1. Potential energy curve for 1.

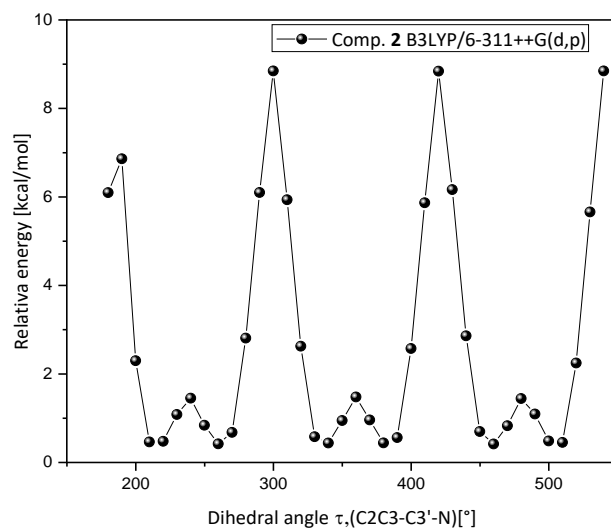

Figure S2. Potential energy curve for 2.

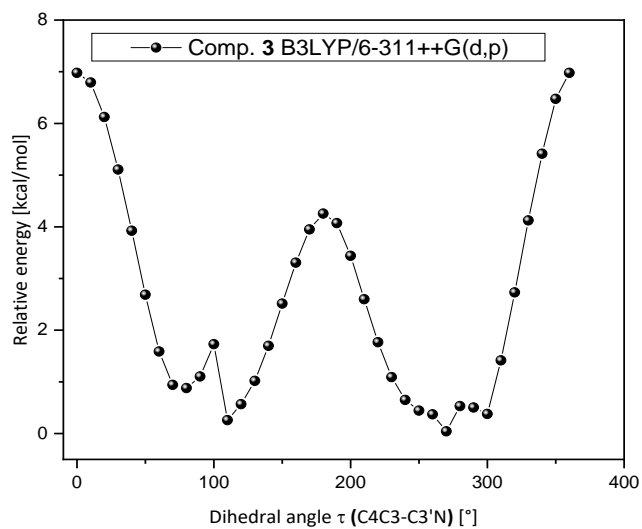

Figure S3. Potential energy curve for 3.

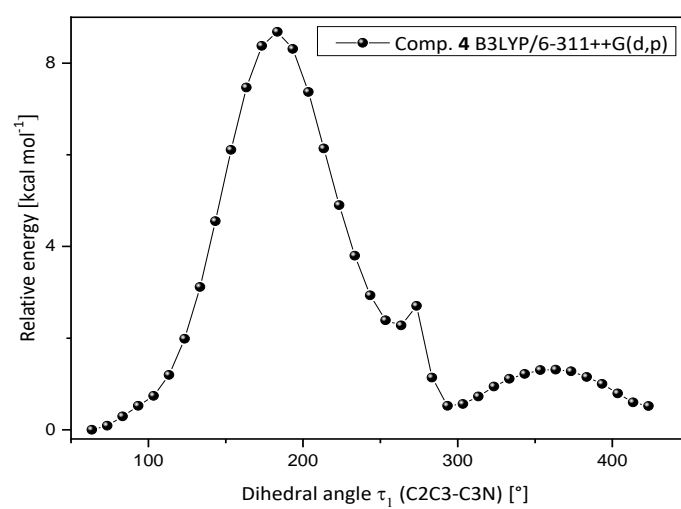

**Figure S4.** Potential energy curve for **4**.

Linear Relationship between Computed and Experimental  $^1\text{H}$ -NMR Data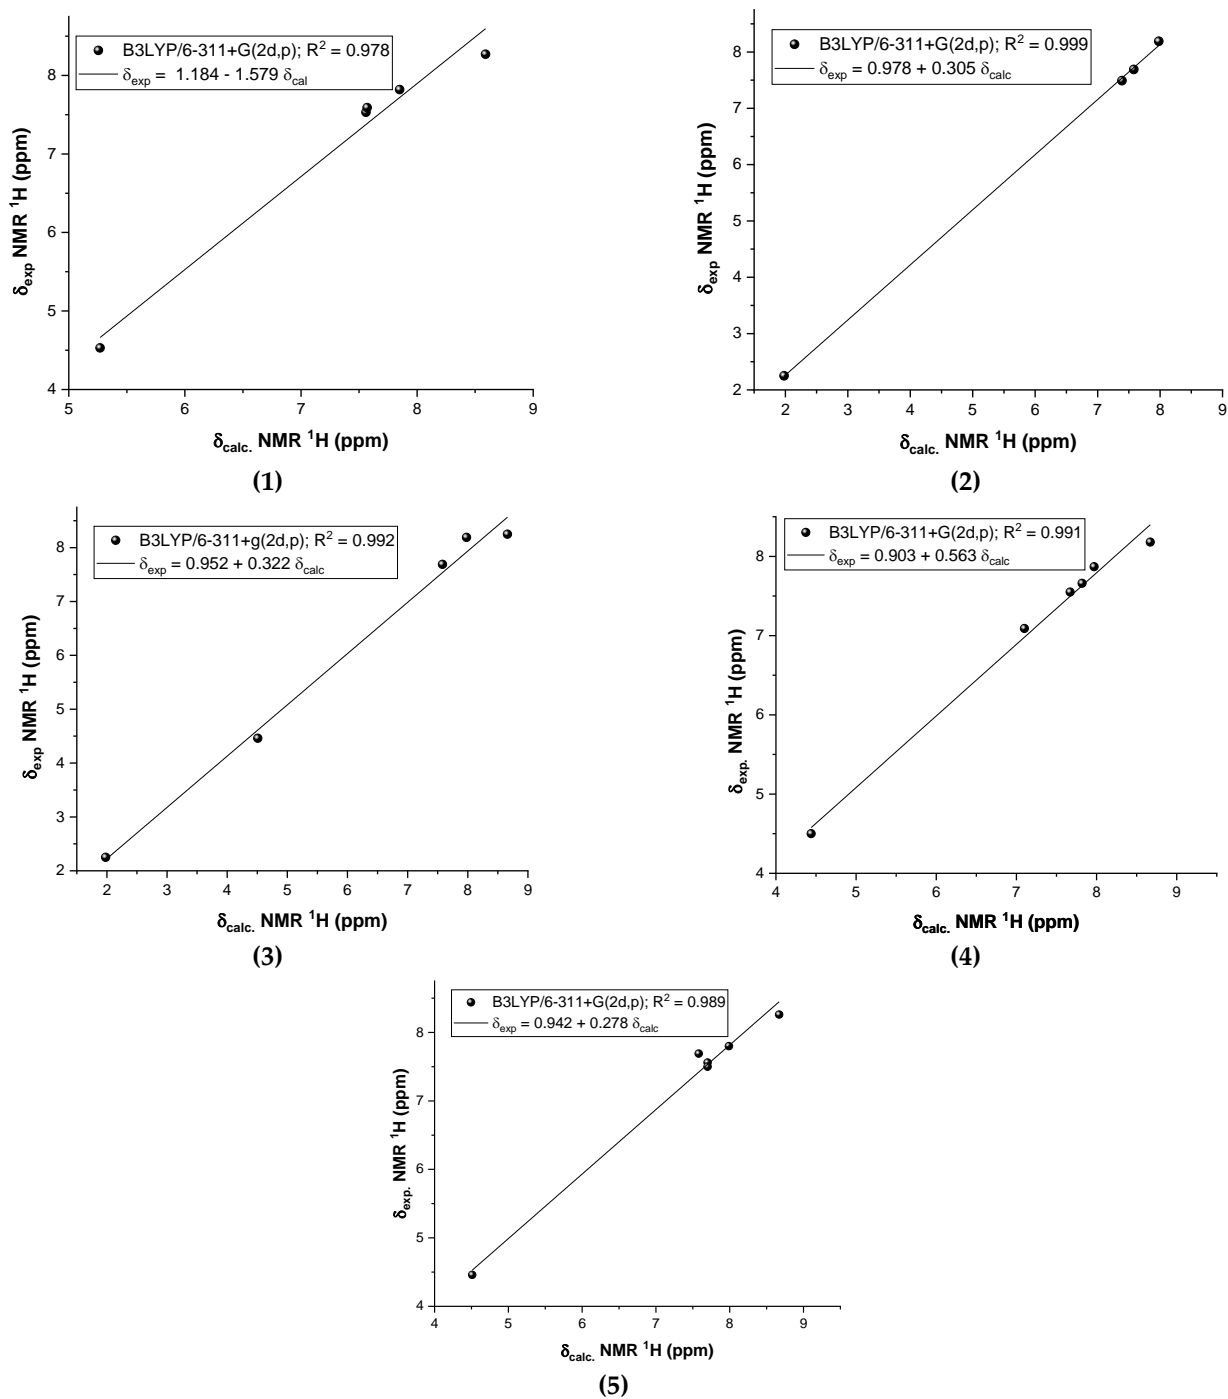Figure S5. Linear relationship data  $^1\text{H}$ -NMR 1–5.

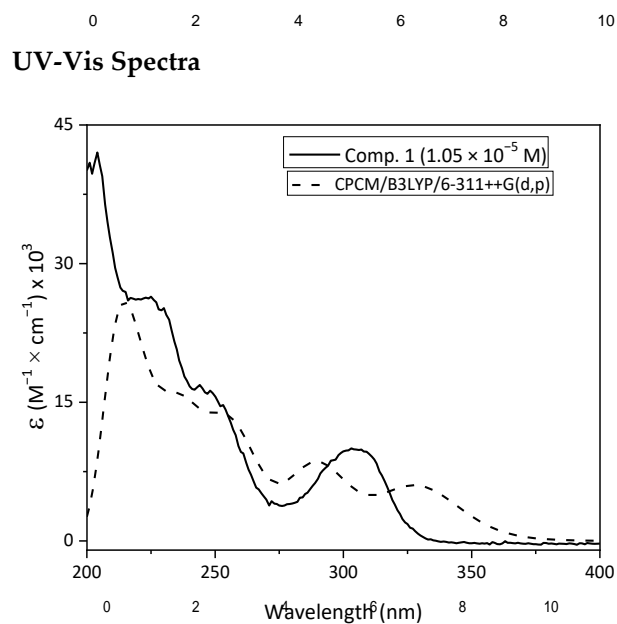

**Figure S6.** Experimental and calculated UV-Vis spectra of **1**.

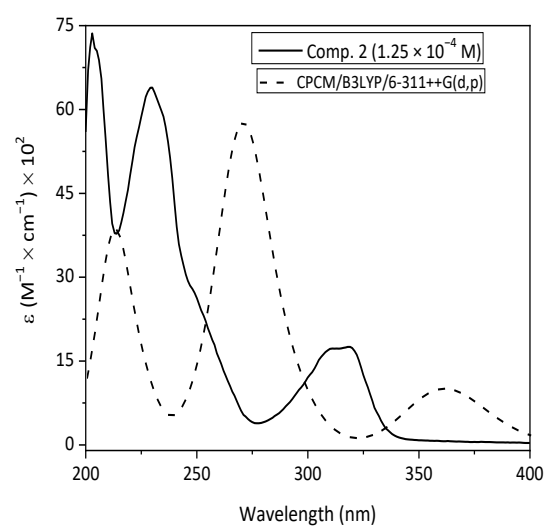

**Figure S7.** Experimental and calculated UV-Vis spectra of **2**.

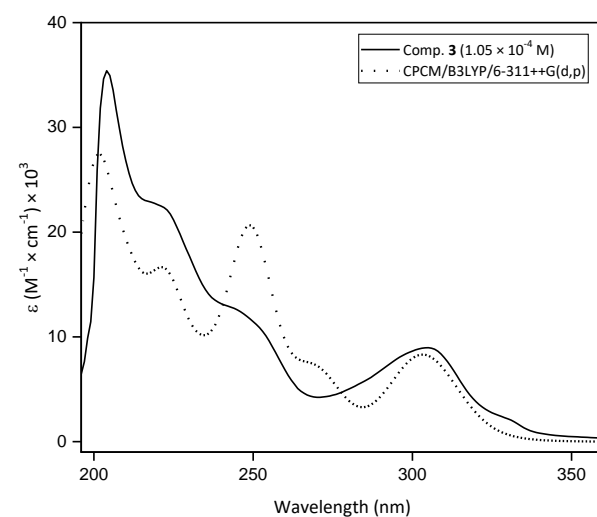

**Figure S8.** Experimental and calculated UV-Vis spectra of **3**.

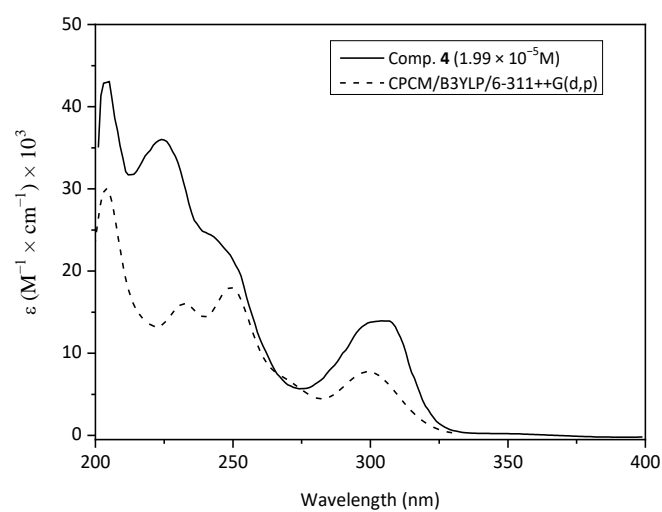

Figure S9. Experimental and calculated UV-Vis spectra of 4.

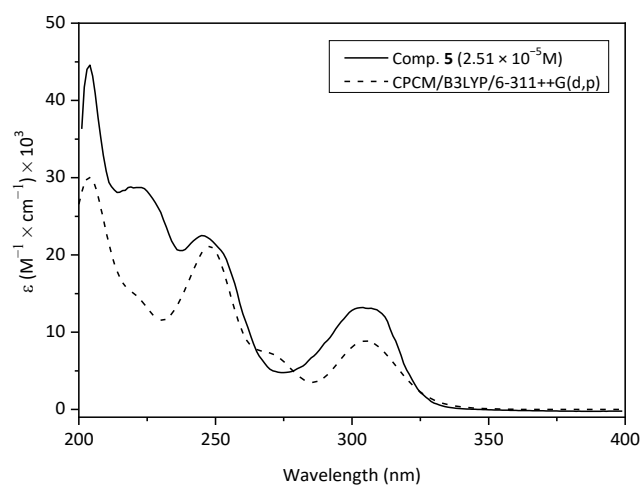

Figure S10. Experimental and calculated UV-Vis spectra of 5.

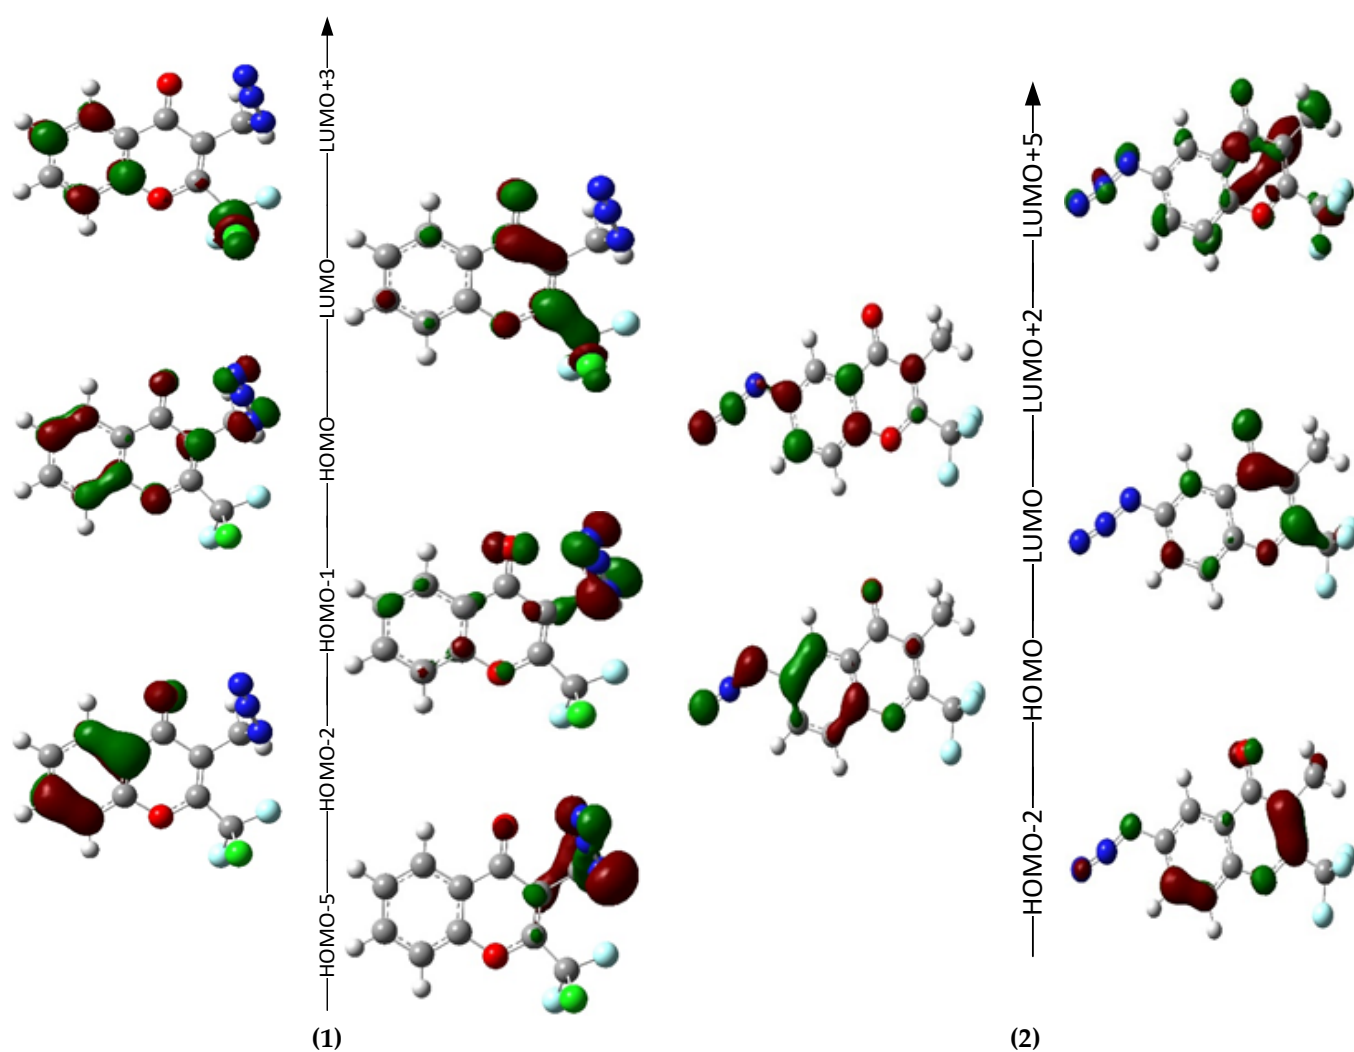

**Figure S11.** Molecular orbitals involved in the electronic transitions of **1** and **2**. The energy scale is only qualitative.



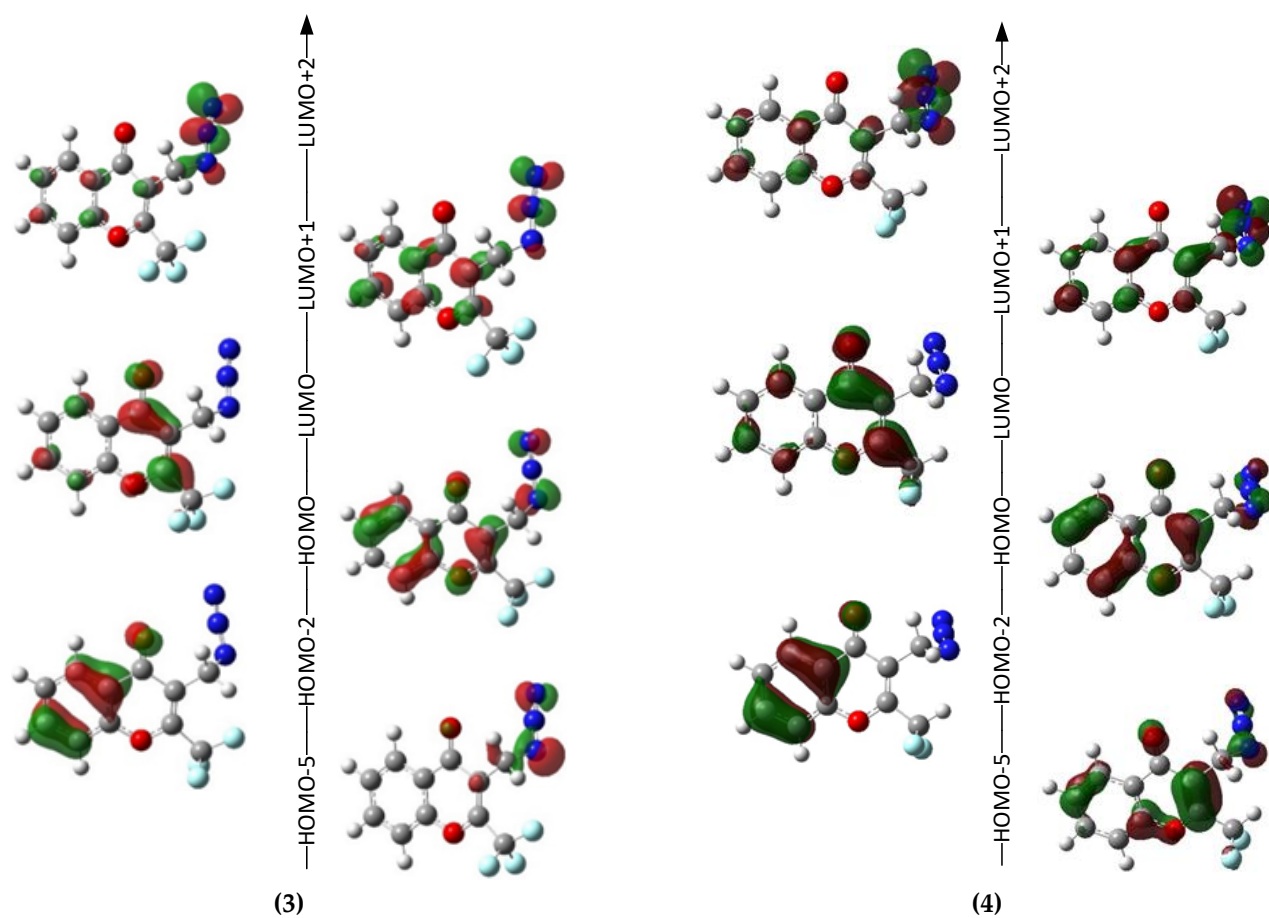

**Figure S12.** Molecular orbitals involved in the electronic transitions of 3 and 4. The energy scale is only qualitative.

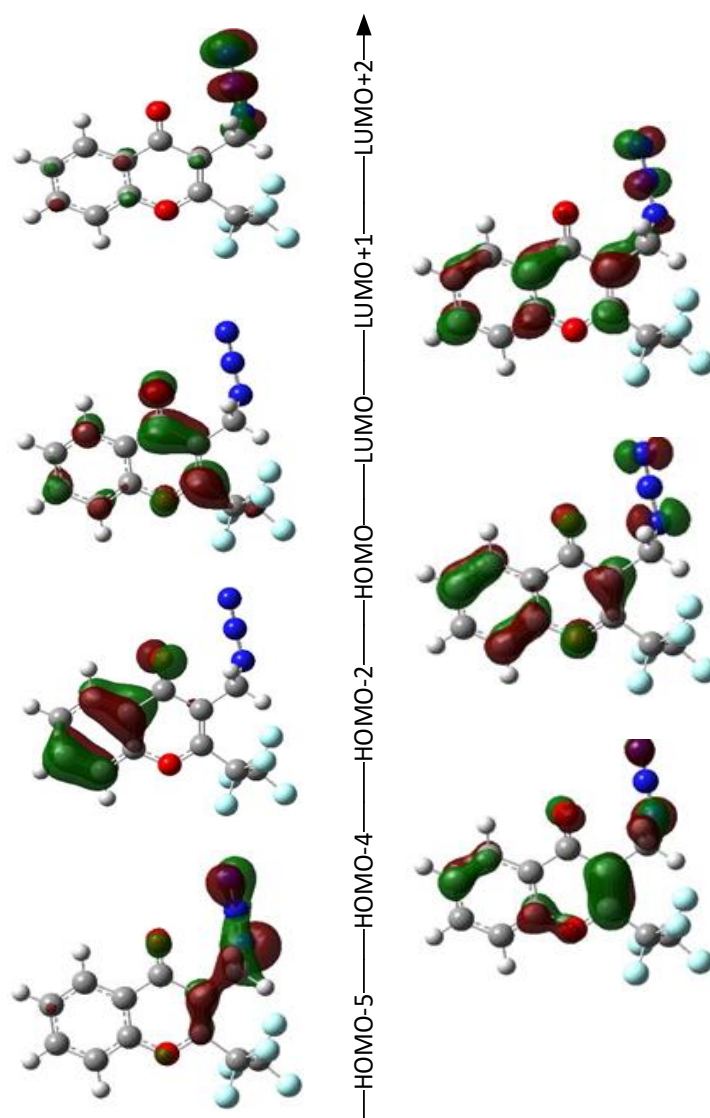

**Figure S13.** Molecular orbitals involved in the electronic transitions of **5**. The energy scale is only qualitative.

### Crystallographic Data

**Table S2.** Crystal data and structure refinement results for 3-dibromomethyl-2-difluoromethyl chromone.

| Parameters           |  | Result                                                                      |
|----------------------|--|-----------------------------------------------------------------------------|
| Empirical formula    |  | C <sub>11</sub> H <sub>7</sub> F <sub>2</sub> N <sub>3</sub> O <sub>2</sub> |
| Formula weight       |  | 251.20                                                                      |
| Temperature          |  | 296(2) K                                                                    |
| Wavelength           |  | 0.71073 Å                                                                   |
| Crystal system       |  | orthorhombic                                                                |
| Space group          |  | Pbca                                                                        |
| Unit cell dimensions |  | 13.5520(5)                                                                  |
|                      |  | 7.1829(4)                                                                   |
|                      |  | 22.2110(9)                                                                  |
| $\alpha/^\circ$      |  | 90                                                                          |
| $\beta/^\circ$       |  | 90                                                                          |

|                                                   |                                                               |
|---------------------------------------------------|---------------------------------------------------------------|
| $\gamma/^\circ$                                   | 90                                                            |
| Volume ( $\text{\AA}^3$ )                         | 2162.1(2) $\text{\AA}^3$                                      |
| Z                                                 | 8                                                             |
| Density (calculated, $\text{Mg}/\text{cm}^3$ )    | 1.543                                                         |
| Absorption coefficient ( $\text{mm}^{-1}$ )       | 0.132                                                         |
| $F(000)/\text{mm}^3$                              | 1024.0                                                        |
| Crystal size                                      | $0.299 \times 0.181 \times 0.113 \text{ mm}^3$                |
| $\vartheta$ -range for data collection            | 3.338 to $26.466^\circ$                                       |
| Index ranges                                      | $-11 \leq h \leq 17, -6 \leq k \leq 8, -24 \leq l \leq 27$    |
| Reflections collected                             | 6549                                                          |
| Independent reflections                           | 2173 [ $R_{\text{int}} = 0.0260, R_{\text{sigma}} = 0.0274$ ] |
| Observed reflections [ $I > 2\sigma(I)$ ]         | 1429                                                          |
| Completeness to $\vartheta = 71.98^\circ$         | 99.8 %                                                        |
| Refinement method                                 | Complete least squares matrix in $F^2$                        |
| Data / restraints / parameters                    | 2173/0/191                                                    |
| Goodness-of-fit on $F^2$                          | 1.023                                                         |
| Final R indices <sup>a</sup> [ $I > 2\sigma(I)$ ] | $R_1 = 0.0418, wR_2 = 0.0912$                                 |
| R indices (all data)                              | $R_1 = 0.0732, wR_2 = 0.1078$                                 |
| Largest diff. peak and hole $e \text{\AA}^{-3}$   | 0.142 and $-0.159 e \text{\AA}^{-3}$                          |
| Identification code                               | CCDC 2119625                                                  |

<sup>a</sup>  $R_1 = \sum ||F_o| - |F_c|| / \sum |F_o|$ ,  $wR_2 = [\sum w(|F_o|^2 - |F_c|^2)^2 / \sum w(|F_o|^2)^2]^{1/2}$ .

### Crystallographic Structural Results

**Table S3.** Bond lengths [ $\text{\AA}$ ] and angles [ $^\circ$ ] for 3-azidomethyl-2-difluoromethyl chromone (**4**).

| Type bond  | Exp.      | Calc.  |
|------------|-----------|--------|
| r (O1–C2)  | 1.355 (2) | 1.3462 |
| r (C2–C3)  | 1.339 (3) | 1.3530 |
| r (C3–C4)  | 1.462 (3) | 1.4776 |
| r (C4–C4a) | 1.468 (3) | 1.4743 |
| r (C4a–C5) | 1.398 (3) | 1.4048 |
| r (C5–C6)  | 1.363 (3) | 1.3830 |
| r (C6–C7)  | 1.388 (4) | 1.4042 |
| r (C7–C8)  | 1.363 (4) | 1.3852 |
| r (C8–C8a) | 1.389 (3) | 1.3956 |
| r (C8a–O1) | 1.375 (2) | 1.3702 |
| r (C3–C3') | 1506 (3)  | 1.5151 |
| r (C3'–N1) | 1.478 (3) | 1.4866 |
| r (N1–N2)  | 1.221 (2) | 1.2339 |
| r (N2–N3)  | 1.126 (3) | 1.1327 |
| r (C4–O2)  | 1.227 (2) | 1.2252 |
| r (C2–C2') | 1.495 (3) | 1.5105 |
| r (C2'–F1) | 1.363 (3) | 1.3654 |
| r (C2'–F2) | 1.351 (2) | 1.3724 |

**Table S4.** Angles [°] for 3-azidomethyl-2-difluoromethyl chromone (**4**).

| Atoms      | Angle <sub>exp.</sub> [°] | Angle <sub>calc.</sub> [°] | Atoms     | Angle <sub>calc.</sub> [°] |
|------------|---------------------------|----------------------------|-----------|----------------------------|
| C5–C6–C7   | 120.2 (2)                 | 120.03                     | C2–C3–C4  | 119.40                     |
| C6–C5–C4a  | 120.4 (3)                 | 120.36                     | C2–C3–C3' | 123.13                     |
| C2–C3–C3   | 117.8 (2)                 | 123.13                     | C4–C3–C3' | 117.47                     |
| C5–C4a–C8a | 119.91 (17)               | 118.43                     | C3–C2–O1  | 124.73                     |
| C4–C4a–C8a | 122.3 (2)                 | 120.01                     | C3–C2–C2' | 124.54                     |
| O1–C8a–C4a | 121.80 (17)               | 121.39                     | C2'–C2–O1 | 110.73                     |
| O1–C8a–C8  | 115.66 (19)               | 116.71                     | F2–C2'–F1 | 107.23                     |
| C4a–C8a–C8 | 122.5 (2)                 | 121.90                     | F2–C2'–C2 | 109.51                     |
| C7–C8–C8a  | 117.8 (2)                 | 118.52                     | F1–C2'–C2 | 109.99                     |
| C8–C7–C6   | 121.3 (2)                 | 120.75                     | N1–C3'–C3 | 114.00                     |
| O2–C4–C3   | 121.84 (18)               | 122.25                     | N2–N1–C3' | 116.04                     |
| O2–C4–C4a  | 123.17 (18)               | 122.95                     | N3–N2–N1  | 172.86                     |
| C3–C4–C4a  | 114.99 (17)               | 114.79                     | C2–O1–C8a | 119.66                     |

**Table S5.** Fractional Atomic Coordinates ( $\times 10^4$ ) and Equivalent Isotropic displacement Parameters ( $\text{\AA}^2 \times 10^3$ ) for **4**.  $U_{eq}$  is defined as 1/3 of the trace of the orthogonalised  $U_{ij}$  tensor.

| Atom | x          | y          | z          | U(eq)     |
|------|------------|------------|------------|-----------|
| C6   | 9083(2)    | 3749(4)    | 5535.6(14) | 75.7(8)   |
| C5   | 8785.8(17) | 4132(3)    | 6108.6(12) | 60.5(6)   |
| C4a  | 7781.5(14) | 4232(2)    | 6248.1(9)  | 45.5(5)   |
| C8a  | 7113.1(14) | 3915(3)    | 5789.9(9)  | 46.8(5)   |
| C8   | 7404(2)    | 3524(3)    | 5203.8(10) | 62.8(6)   |
| C7   | 8390(2)    | 3446(4)    | 5086.1(13) | 77.1(8)   |
| C4   | 7426.7(15) | 4642(3)    | 6858.5(9)  | 46.6(5)   |
| C3   | 6354.4(14) | 4775(3)    | 6918.3(8)  | 43.6(5)   |
| C2   | 5776.1(14) | 4407(3)    | 6444.0(9)  | 45.0(5)   |
| C2'  | 4673.1(16) | 4345(3)    | 6440.9(11) | 56.5(6)   |
| C3'  | 5958.1(18) | 5330(3)    | 7525.7(10) | 53.8(5)   |
| N1   | 5937.8(12) | 3727(3)    | 7943.0(7)  | 55.2(5)   |
| N2   | 6602.4(14) | 3717(3)    | 8314.5(9)  | 64.5(5)   |
| N3   | 7172.9(19) | 3561(4)    | 8679.4(12) | 118.6(11) |
| O1   | 6111.4(10) | 3969.2(19) | 5887.0(6)  | 50.7(4)   |
| O2   | 7979.7(10) | 4868(2)    | 7289.6(6)  | 66.8(4)   |
| F1   | 4389.1(9)  | 2573(2)    | 6306.4(6)  | 73.0(4)   |
| F2   | 4313.1(9)  | 5430(2)    | 5995.3(6)  | 79.8(4)   |

**Table S6.** Selected intermolecular contacts [ $\text{\AA}$  and  $^\circ$ ] for **4**.

| D–X...A                     | d(D–X) | d(X...A) | d(D...A) | $\angle$ (D–H...A) | R **  | $E_{ele}$ | $E_{pol}$ | $E_{dis}$ | $E_{rep}$ | $E_{tot}$ |
|-----------------------------|--------|----------|----------|--------------------|-------|-----------|-----------|-----------|-----------|-----------|
| C7–H7...F2 <sup>i</sup>     | 0.920  | 2.540    | 3.455    | 173                | 10.08 | −3.6      | −0.7      | −7.5      | 5.7       | −7.3      |
| C3'–H3'A...F2 <sup>ii</sup> | 0.963  | 2.669    | 3.090    | 107                | 6.96  | −7.1      | −1.7      | −23.4     | 12.9      | −21.2     |
| C8–H8...F1 <sup>iii</sup>   | 0.978  | 2.731    | 3.616    | 151                | 8.43  | −2.7      | −0.4      | −7.6      | 3.1       | −7.9      |
| C2'–H...O2 <sup>iv</sup>    | 0.971  | 2.724    | 3.655    | 161                | 7.88  | −11.4     | −2.8      | −16.6     | 11.2      | −21.6     |
| C5–H5...N1 <sup>v</sup>     | 0.897  | 2.779    | 3.609    | 154                | 7.88  | −11.4     | −2.8      | −16.6     | 11.2      | −21.6     |
| C2'–F1...N2 <sup>vi</sup>   | 1.351  | 3.076    | 3.626    | 103                | 6.96  | −7.1      | −1.7      | −23.4     | 12.9      | −21.2     |
| C2'–F2...N3 <sup>vii</sup>  | 1.363  | 3.083    | 3.445    | 93                 | 7.88  | −11.4     | −2.8      | −16.6     | 11.2      | −21.6     |

Symmetry transformations used to generate equivalent atoms: (i)  $1/2+x, 1/2-y, 1-z$ ; (ii)  $1-x, -1/2+y, 1.5-z$ ; (iii)  $-x, -y, 1-z$ ; (iv)  $-1/2+x, y, 1/2-z$ ; (v)  $1/2+x, y, 1/2-z$ ; (vi)  $-x, 1/2+y, 1/2-z$ ; (vii)  $1/2+x, y, 1/2-z$ . \*\* Distance between molecular centroids (mean atomic position) in  $\text{\AA}$ .

**Table S7.** Geometrical parameters for the  $\pi$ -stacking moieties involved in the  $\pi\cdots\pi$  interactions of **4** ( $\text{\AA}$ ,  $^\circ$ ).

| Rings I – J <sup>a</sup> | $\text{Cg(I)} \cdots \text{Cg(J)}$ <sup>b</sup> | $\text{Cg(I)} \cdots \text{Perp}$ <sup>c</sup> | $\text{Cg(J)} \cdots \text{Perp}$ <sup>d</sup> | $\alpha$ <sup>e</sup> | $\beta$ <sup>f</sup> | $\gamma$ <sup>g</sup> | symmetry           |
|--------------------------|-------------------------------------------------|------------------------------------------------|------------------------------------------------|-----------------------|----------------------|-----------------------|--------------------|
| Cg(2) $\cdots$ Cg(3)     | 3.5691 (2)                                      | 3.4996                                         | 3.4974                                         | 1                     | 12.4                 | 13.6                  | $1/2-x, -1/2+y, z$ |
| Cg(1) $\cdots$ Cg(2)     | 3.5943 (2)                                      | 3.4941                                         | 3.5107                                         | 1                     | 16.9                 | 17.8                  | $1/2-x, -1/2+y, z$ |
| Cg(3) $\cdots$ Cg(3)     | 3.5976 (2)                                      | 3.5022                                         | 3.5038                                         | 0                     | 11.3                 | 11.5                  | $1/2-x, 1/2+y, z$  |
| Cg(1) $\cdots$ Cg(3)     | 3.6739 (2)                                      | 3.4990                                         | 3.5157                                         | 0                     | 13.1                 | 13.2                  | $1/2-x, -1/2+y, z$ |

<sup>a</sup> Cg(1), Cg(2), Cg(3) are the centroids of pyrane, benzene and chromone rings, respectively. <sup>b</sup> Centroid distance between ring i and ring j. <sup>c</sup> Perpendicular distance of Cg(I) on ring J ( $\text{\AA}$ ). <sup>d</sup> Perpendicular distance of Cg(J) on ring I ( $\text{\AA}$ ). <sup>e</sup> Dihedral Angle between Planes I and J (Degrees). <sup>f</sup> Angle between the centroid vector Cg(i)  $\cdots$  Cg(j) and the normal to the plane (i). <sup>g</sup> Angle between the centroid vector Cg(i)  $\cdots$  Cg(j) and the normal to the plane (j).

**Table S8.** Geometrical parameters of C–O... $\pi$  interactions\* for **4** ( $\text{\AA}$ ,  $^\circ$ ).

| Item        | X...Cg <sup>a</sup> | X-perp <sup>b</sup> | $\gamma$ <sup>c</sup> | $\angle$ C–X...Cg(j) | Symmetry           |
|-------------|---------------------|---------------------|-----------------------|----------------------|--------------------|
| C4–O2...Cg1 | 3.8276(2)           | 3.588               | 20.4                  | 75                   | $1/2-x, -1/2+y, z$ |

\* ( $\text{H}\cdots\text{Cg} < \text{\AA}$ ,  $\text{O}\cdots\text{Cg}$  y  $\text{F}\cdots\text{Cg} < \text{\AA}$ ,  $\gamma < 90$ ). <sup>a</sup> Centroid of rings. <sup>b</sup> Perpendicular distance of X to ring plane J. <sup>c</sup> Angle between the Cg–X vector and ring J normal.

**Table S9.** Interaction energies (kJ/mol) for **4**.

| Interaction Molecule Color                                                         | N | Symop               | R     | Electron Density | $E_{elec}$ | $E_{pol}$ | $E_{dis}$ | $E_{rep}$ | $E_{tot}$ |
|------------------------------------------------------------------------------------|---|---------------------|-------|------------------|------------|-----------|-----------|-----------|-----------|
|  | 2 | $-x+1/2, y+1/2, z$  | 4.31  | B3LYP/6-31G(d,p) | −6.9       | −2.4      | −57.4     | 26.4      | −42.7     |
|  | 2 | $-x, y+1/2, -z+1/2$ | 6.96  | B3LYP/6-31G(d,p) | −7.1       | −1.7      | −23.4     | 12.9      | −21.2     |
|  | 2 | $x+1/2, -y+1/2, -z$ | 10.08 | B3LYP/6-31G(d,p) | −3.6       | −0.7      | −7.5      | 5.7       | −7.3      |
|  | 2 | $x+1/2, y, -z+1/2$  | 7.88  | B3LYP/6-31G(d,p) | −11.4      | −2.8      | −16.6     | 11.2      | −21.6     |
|  | 1 | $-x, -y, -z$        | 8.43  | B3LYP/6-31G(d,p) | −2.7       | −0.4      | −7.6      | 3.1       | −7.9      |
|  | 2 | $-x+1/2, -y, z+1/2$ | 11.43 | B3LYP/6-31G(d,p) | −0.6       | −0.4      | −3.2      | 0.6       | −3.4      |
|  | 2 | $x, -y+1/2, z+1/2$  | 11.35 | B3LYP/6-31G(d,p) | −4.2       | −0.6      | −3.6      | 1.6       | −7.1      |
|  | 1 | $-x, -y, -z$        | 11.64 | B3LYP/6-31G(d,p) | 0.5        | −0.5      | −6.7      | 2.9       | −3.9      |

**Table S10.** Scale factors for benchmarked energy models. See Mackenzie et al. IUCrJ (2017).

| Energy Model                                     | k_ele | k_pol | k_disp | k_rep |
|--------------------------------------------------|-------|-------|--------|-------|
| CE-HF ... HF/3-21G electron densities            | 1.019 | 0.651 | 0.901  | 0.811 |
| CE-B3LYP ... B3LYP/6-31G(d,p) electron densities | 1.057 | 0.740 | 0.871  | 0.618 |

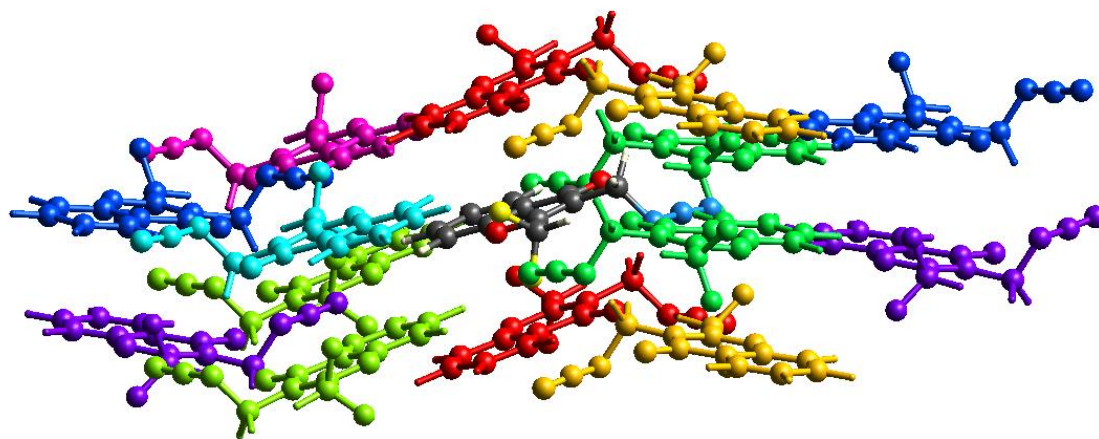**Figure S14.** Interaction energies for 4.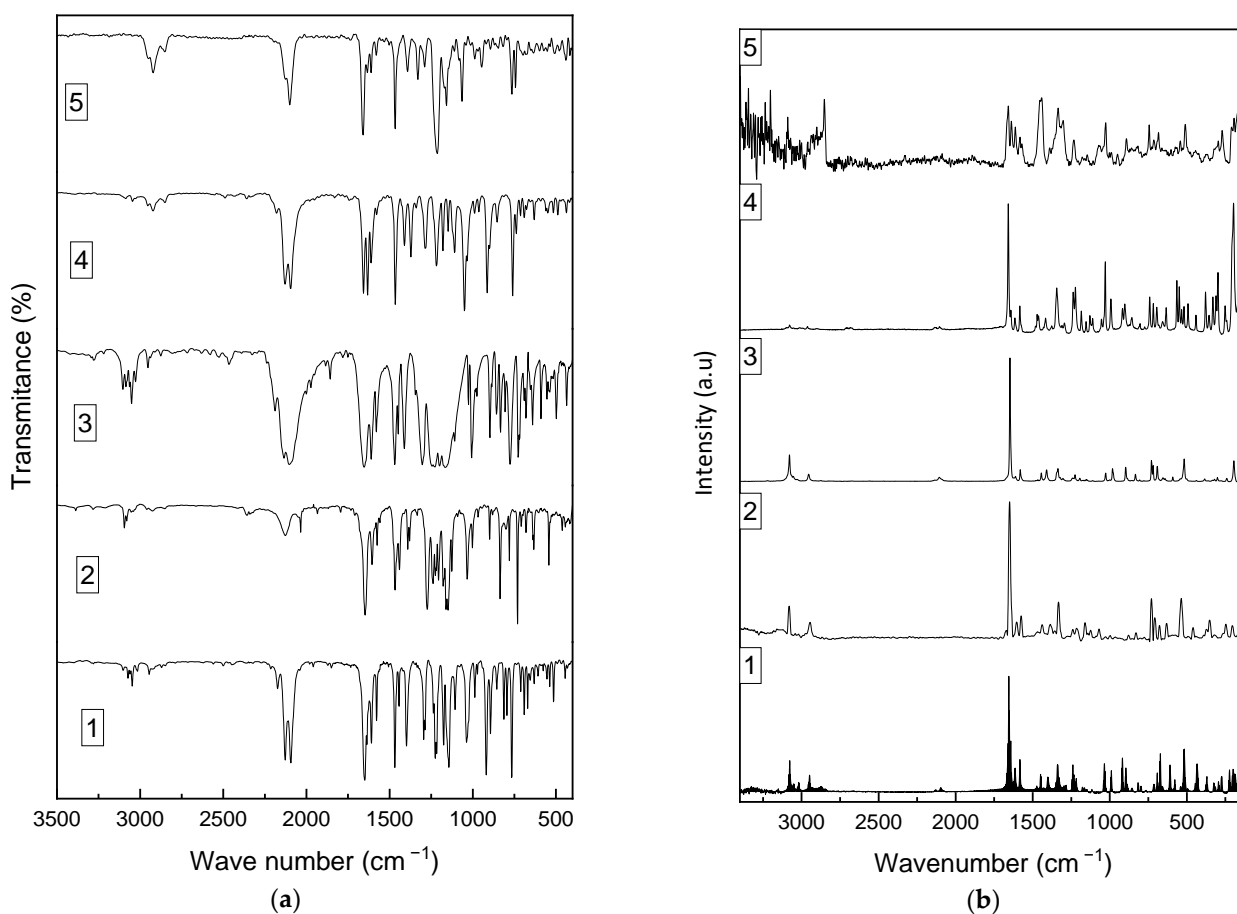**Figure S15.** (a) IR and (b) Raman spectra of 1–5.

## NMR Spectra

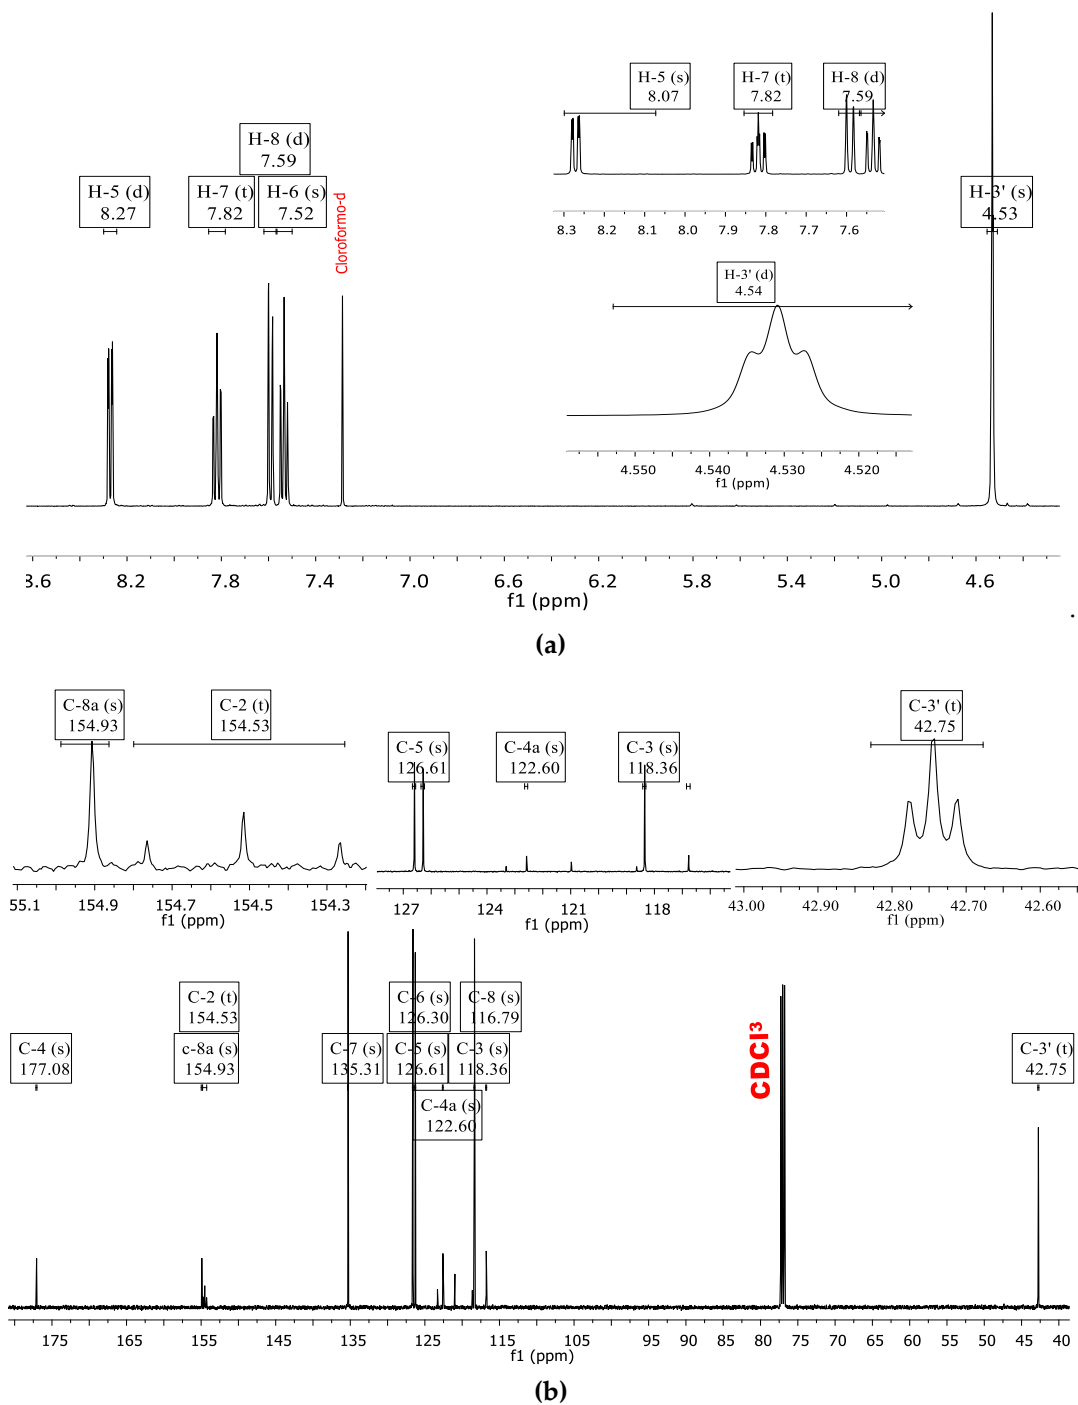

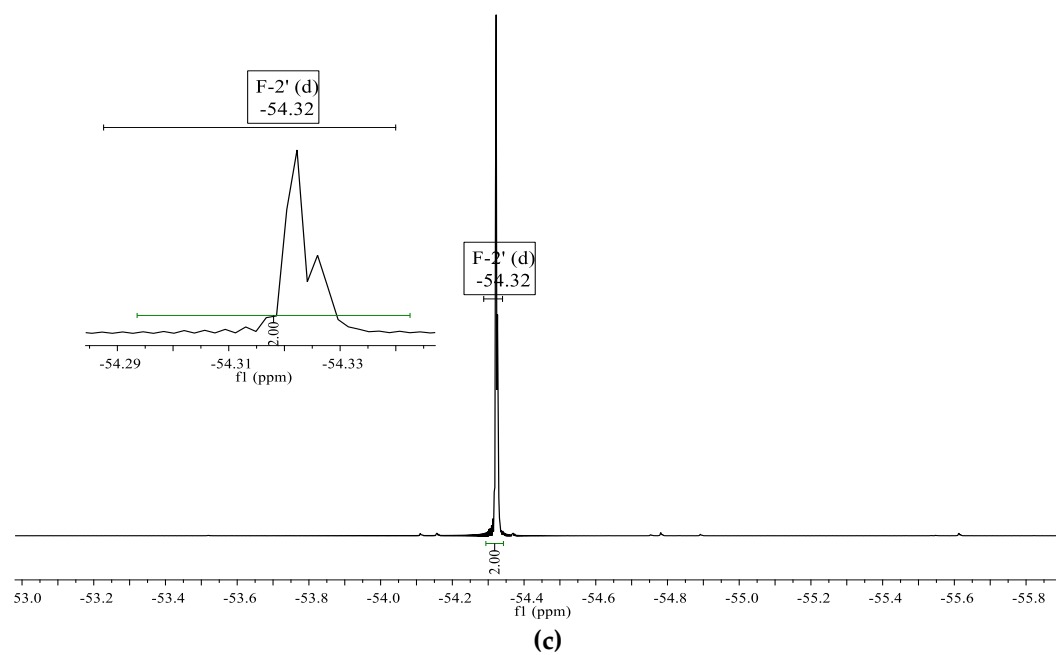

**Figure S16.** Compound 1 (a)  $^1\text{H}$ -NMR, (b)  $^{13}\text{C}$ -NMR and (c)  $^{19}\text{F}$ -NMR.



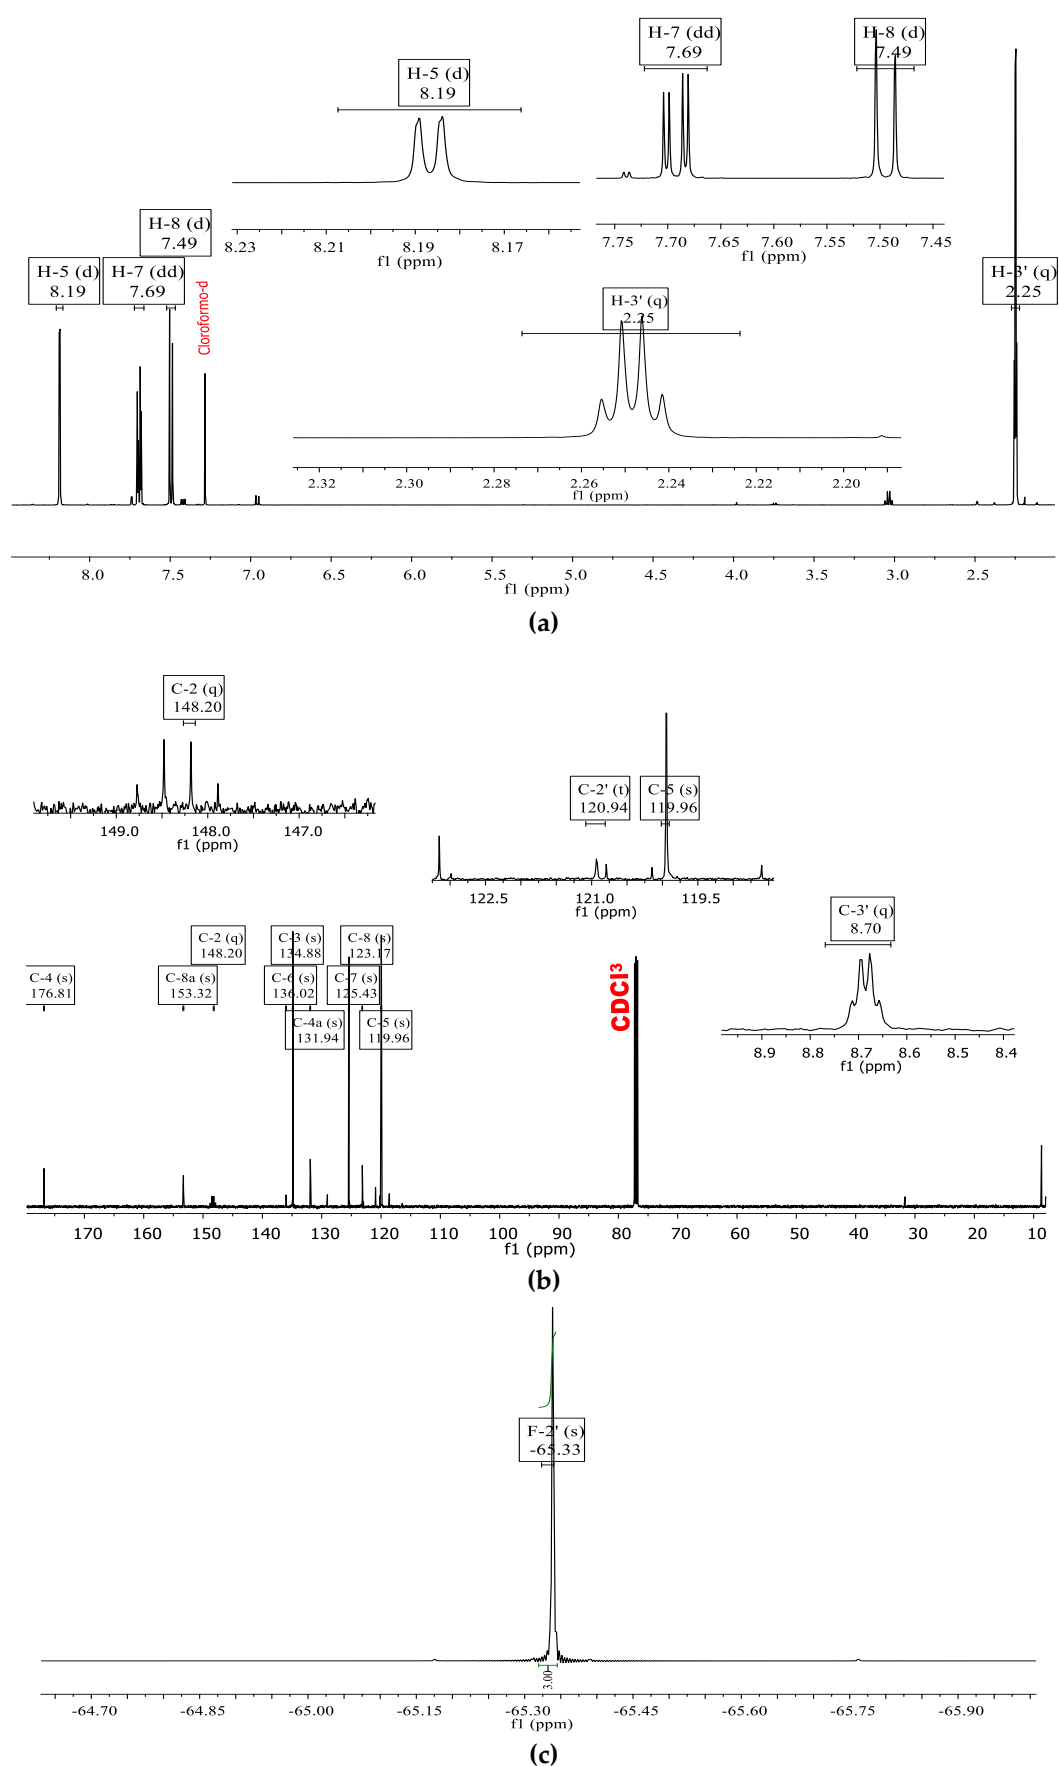Figure S17. Compound 2 (a)  $^1\text{H}$ -NMR, (b)  $^{13}\text{C}$ -NMR and (c)  $^{19}\text{F}$ -NMR.

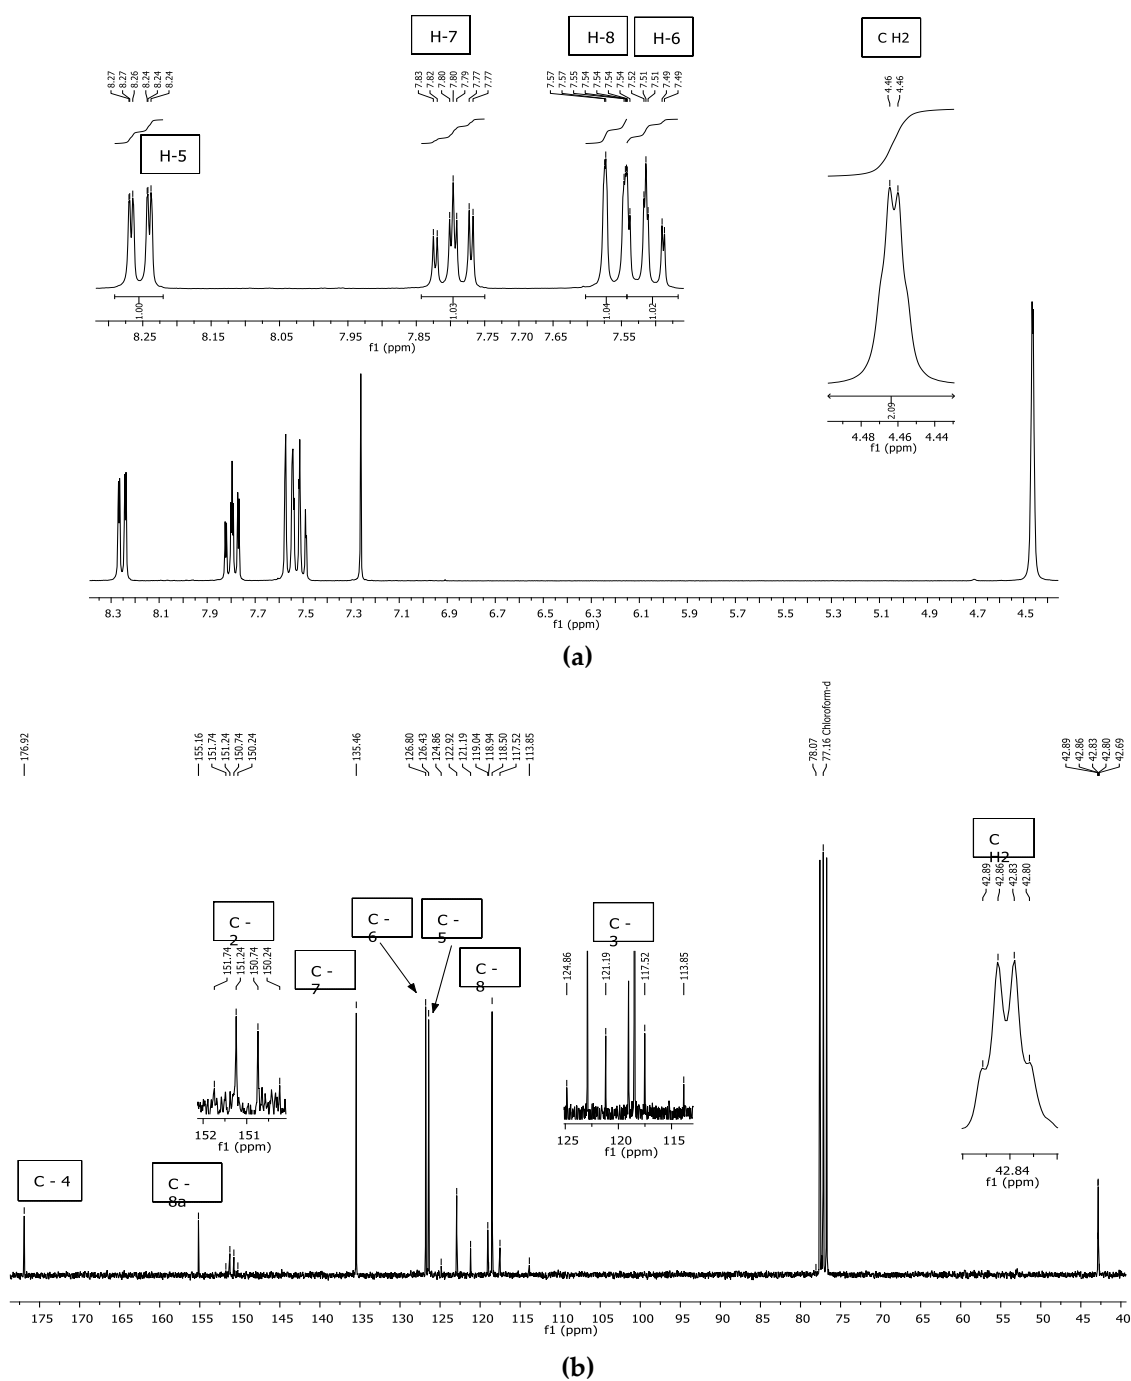

**Figure S18.** Compound **3** (a)  $^1\text{H}$ -NMR, (b)  $^{13}\text{C}$ -NMR and (c)  $^{19}\text{F}$ -NMR.

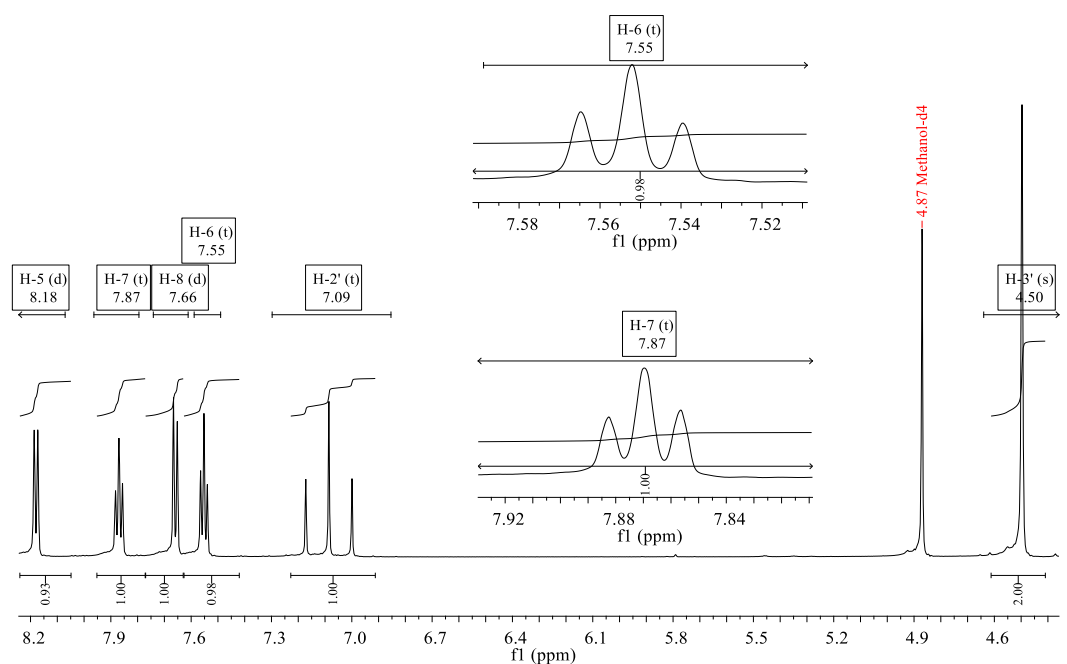

(a)

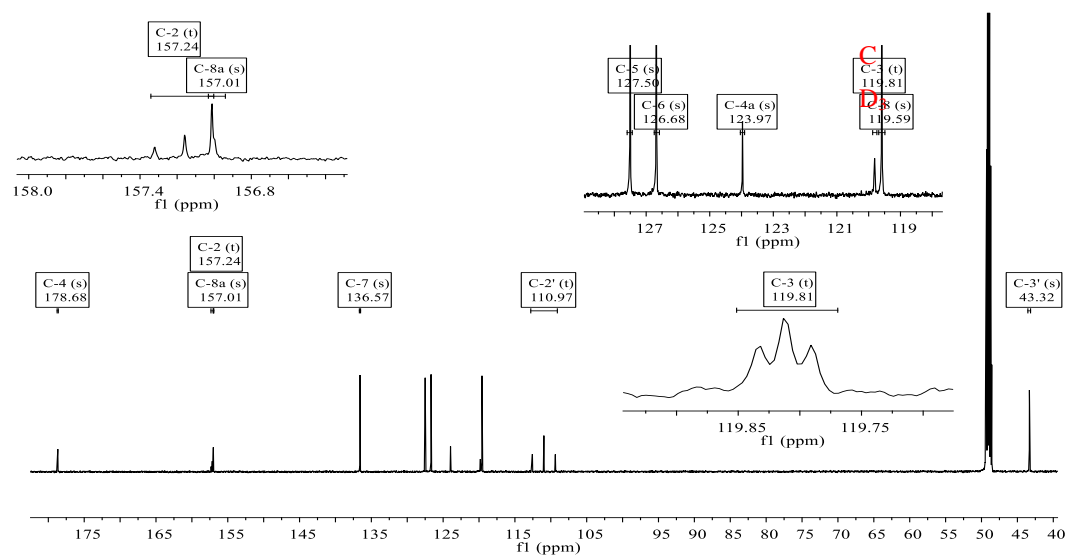

(b)

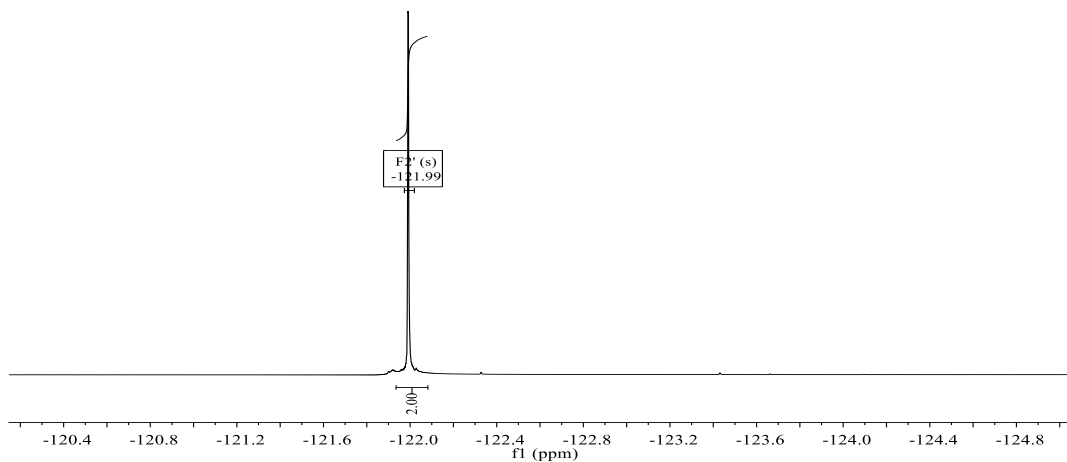

(c)

Figure S19. Compound 4 (a) <sup>1</sup>H-NMR, (b) <sup>13</sup>C-NMR and (c) <sup>19</sup>F-NMR.

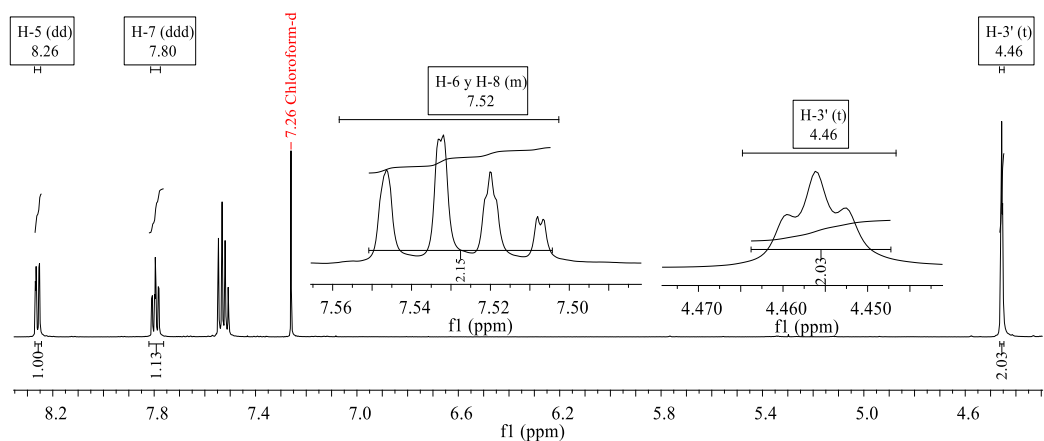

(a)

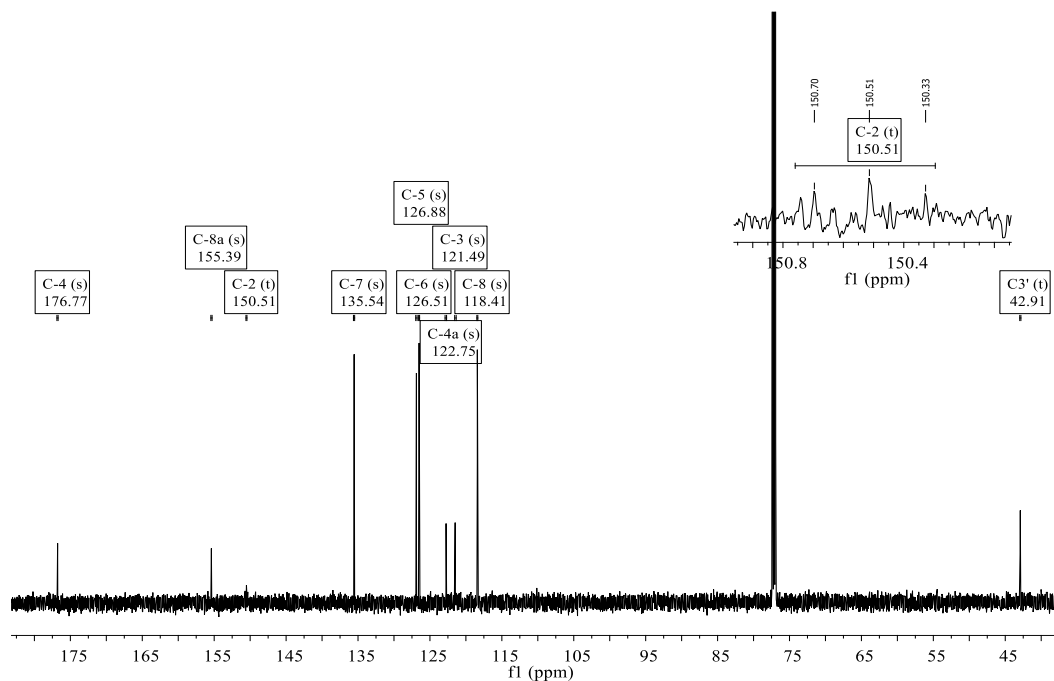

(b)

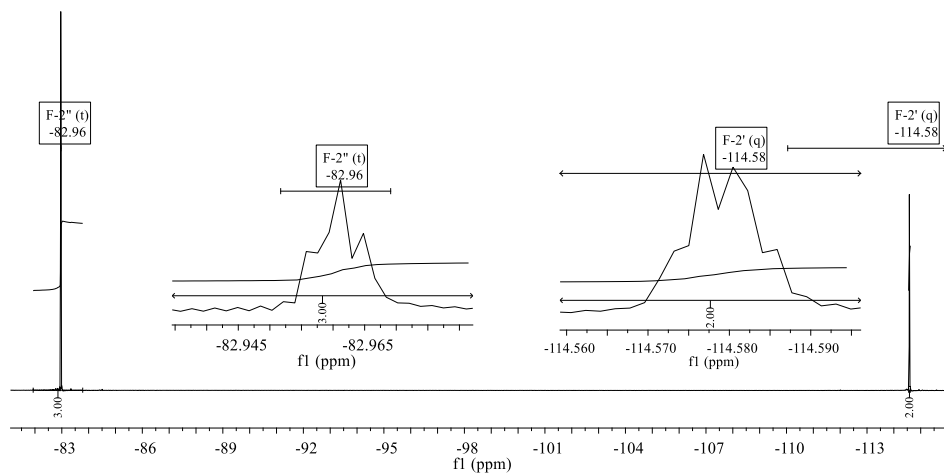

(c)

Figure S20. Compound 5 (a) <sup>1</sup>H-NMR, (b) <sup>13</sup>C-NMR and (c) <sup>19</sup>F-NMR.

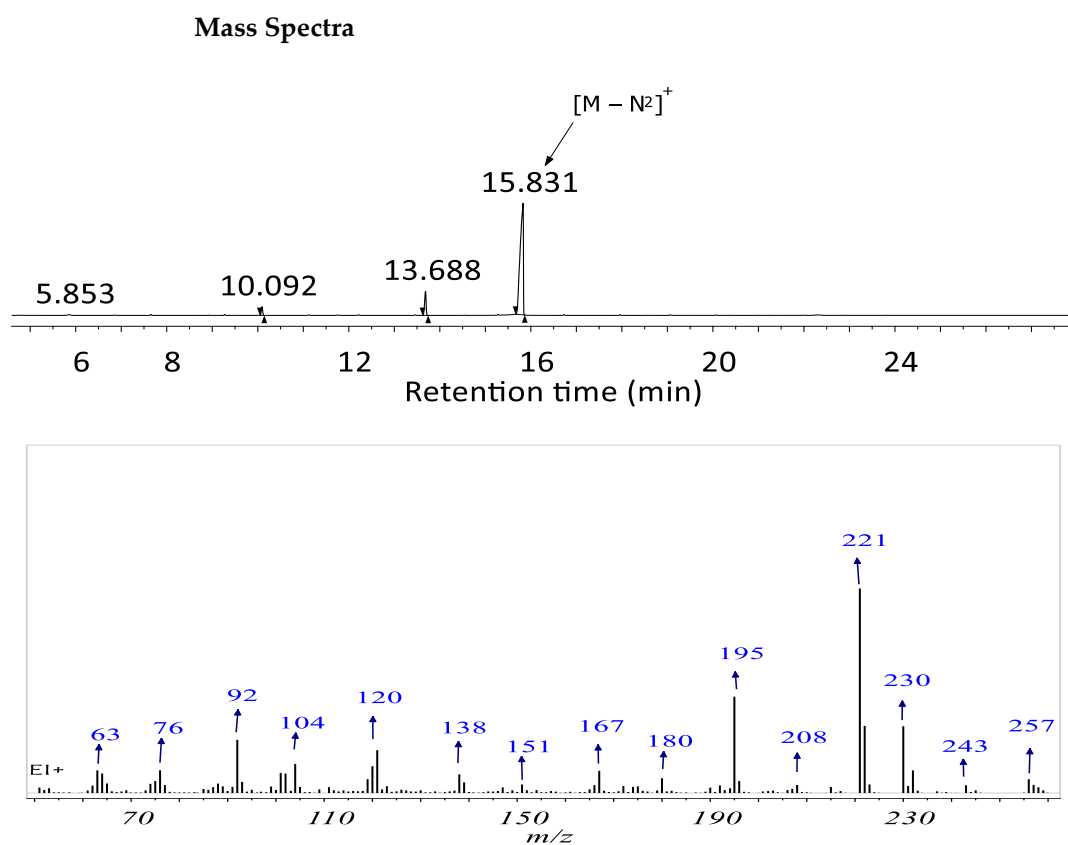

Figure S21. GS-MS of 1.

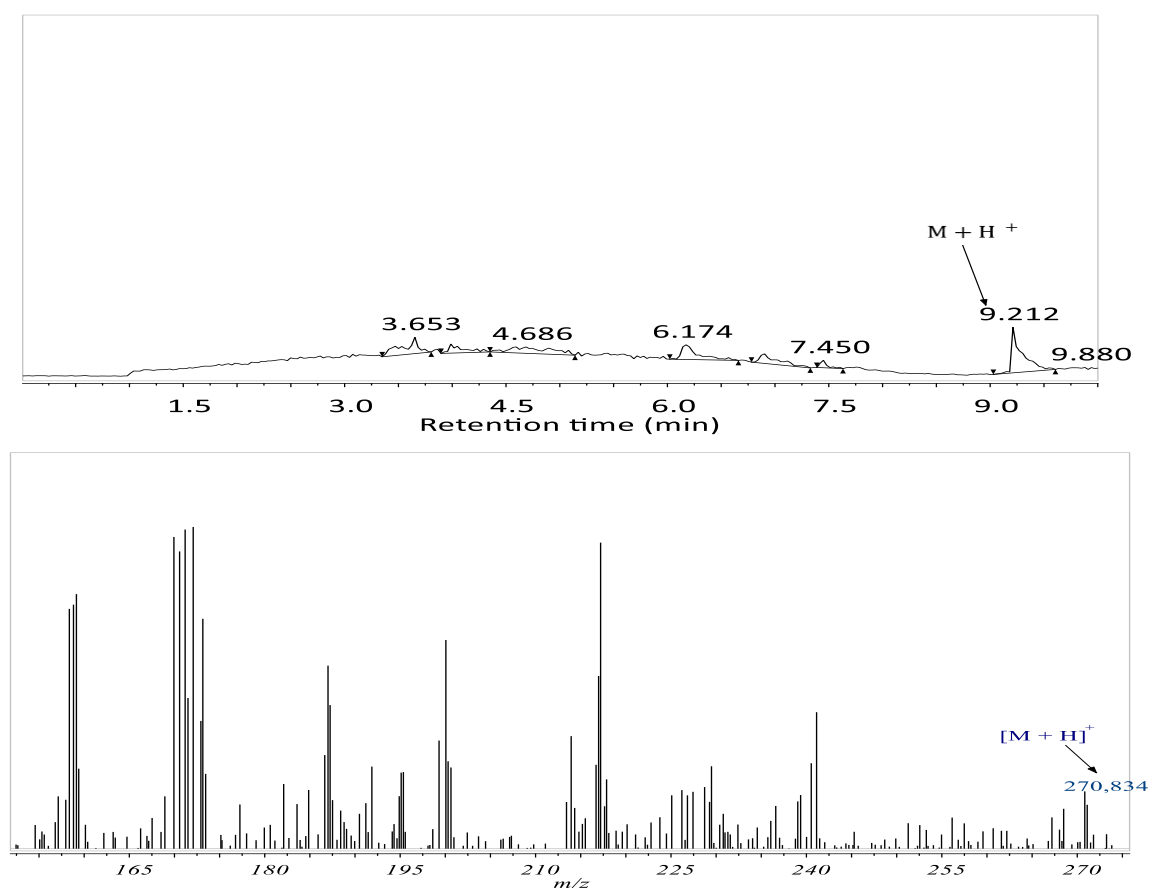

Figure S22. HPLC-EM of 2.

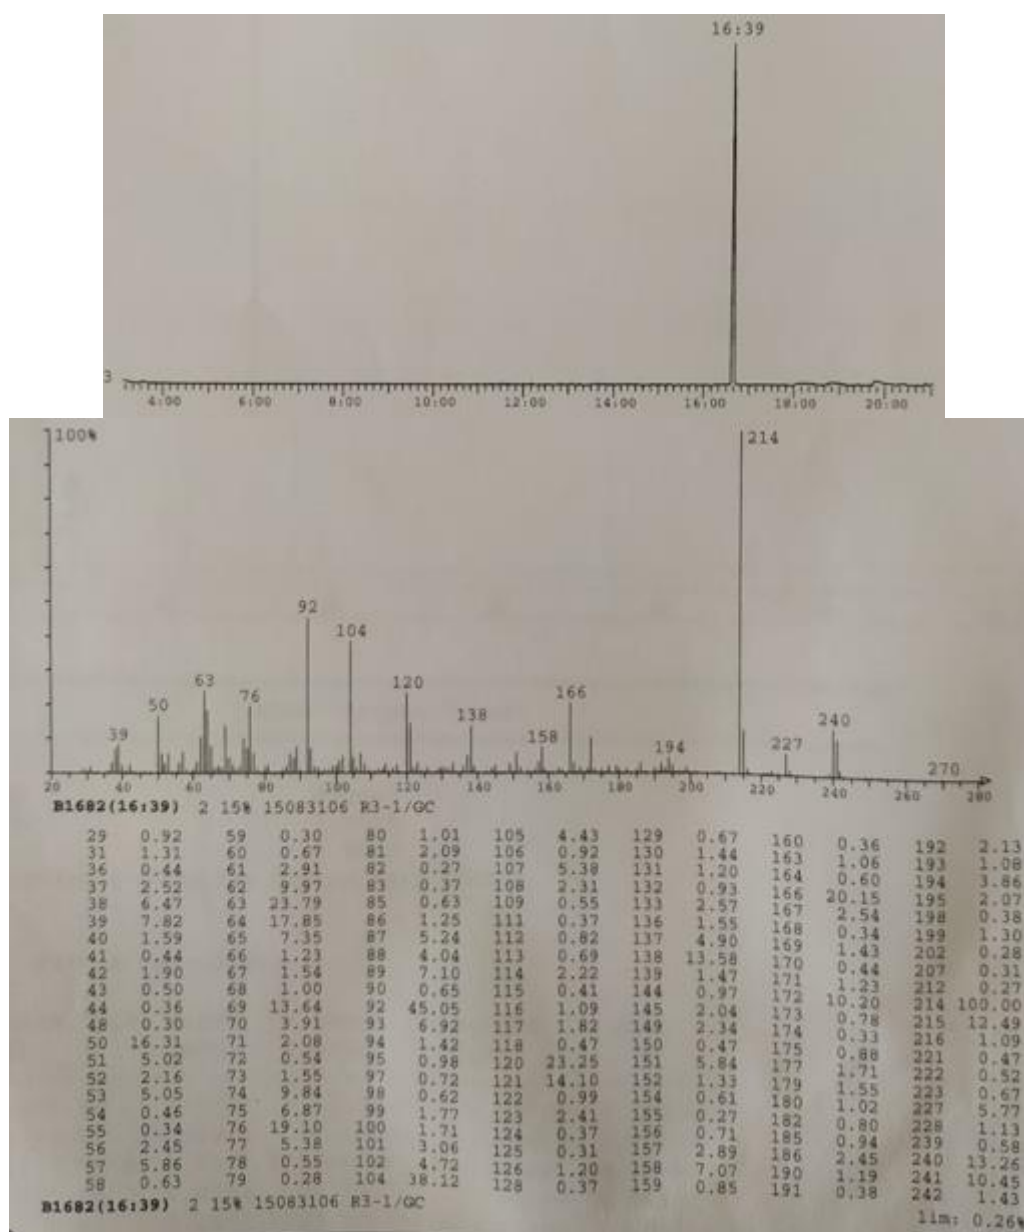

Figure S23. GC-MS of 3.

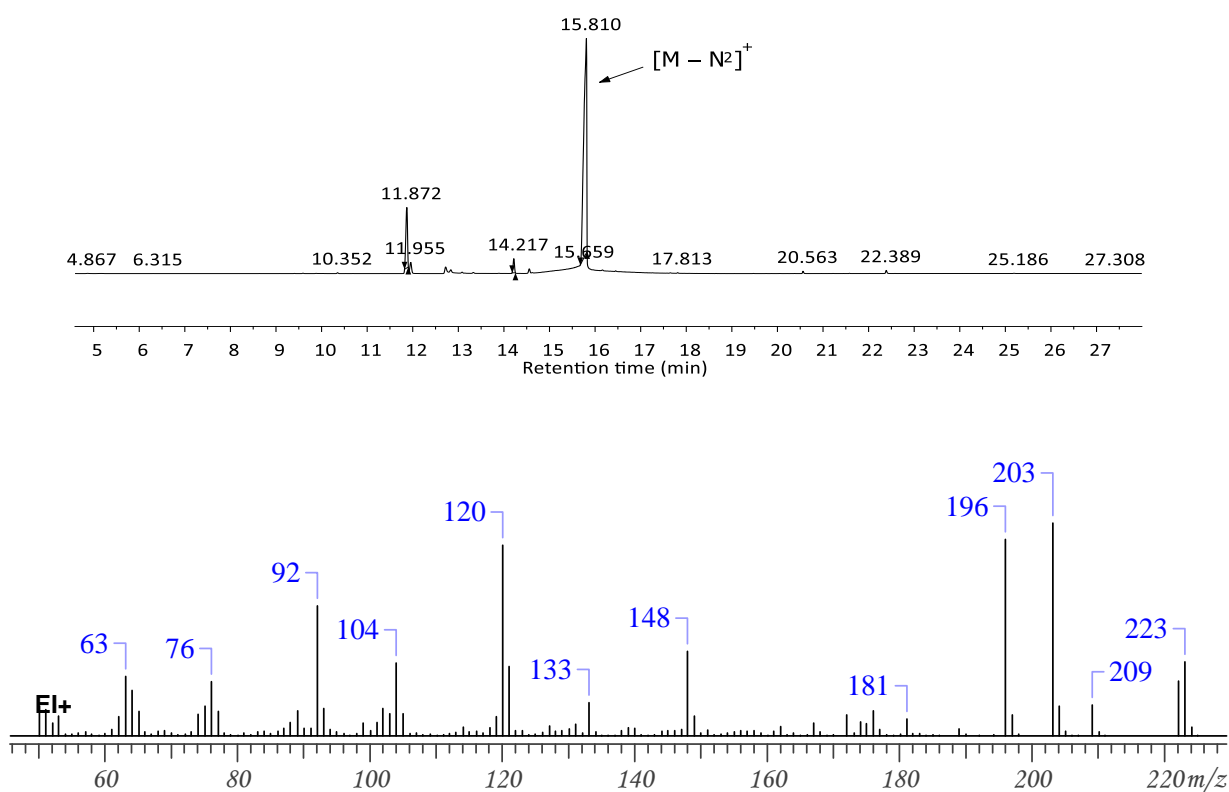

Figure S24. GC-MS of 4.

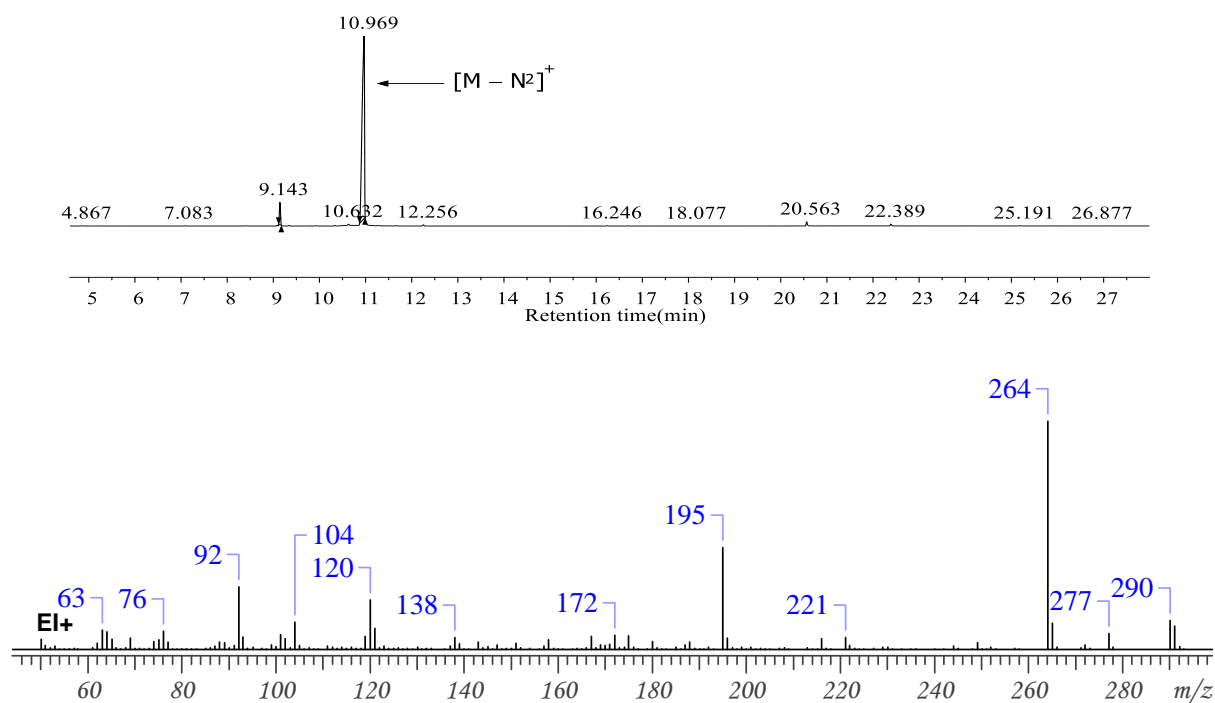

Figure S25. GC-MS of 5.



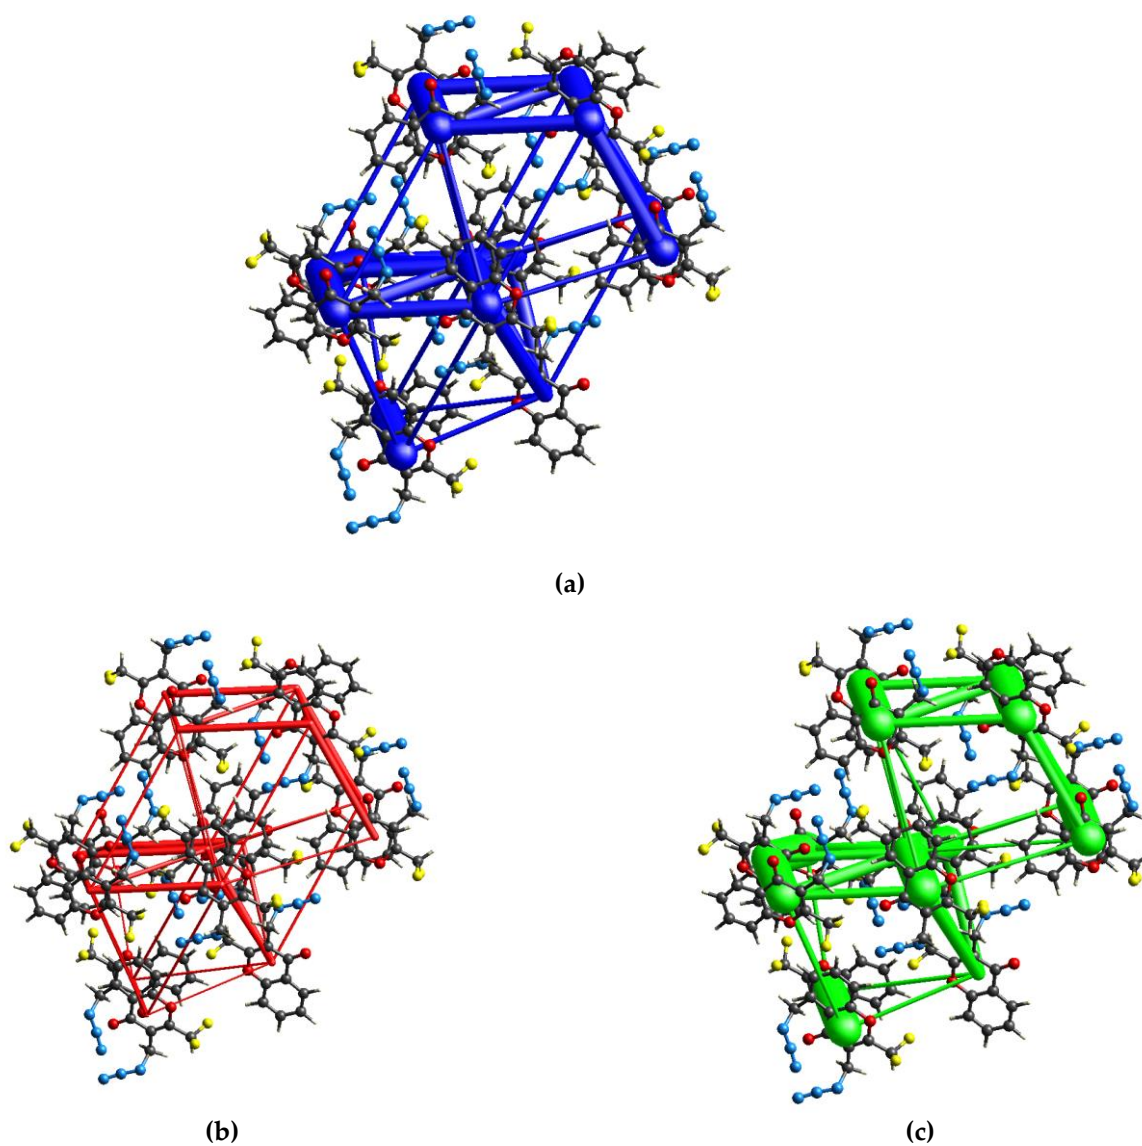

**Figure S26.** Crystal lattice energy analysis applying the CE-B3LYP/6-31G(d,p) energy model and figures of energy frameworks for **4**. (a) Total Energy (b) Electrostatic Energy, (c) Dispersive Energy.
